# Supplementary material for: Coupling with a narrow-band-gap semiconductor for the enhancement of visible-light photocatalytic activity: preparation of Bi2OxS3−x/Nb6O17 and application to the degradation of methyl orange
Source: Royal Society of Chemistry journal article supplement (doi:10.1039/c6dt02338j), 2016-01-01
Supplement: c6dt02338j1.pdf [file c6dt02338j1.pdf]

## Electronic Supplementary Information

### **Coupling with a narrow-band-gap semiconductor for enhancement of visible-light photocatalytic activity: preparation of $\text{Bi}_2\text{O}_x\text{S}_{3-x}$ / $\text{Nb}_6\text{O}_{17}$ and application for degradation of methyl orange**

Gang Yan,<sup>a</sup> Hongfei Shi,<sup>a</sup> Huaqiao Tan,<sup>\*a</sup> Wanbin Zhu,<sup>b</sup> Yonghui Wang,<sup>\*a</sup> Hongying Zang<sup>a</sup> and Yangguang Li<sup>\*a</sup>

<sup>a</sup> Key Laboratory of Polyoxometalate Science of Ministry of Education, Department of Chemistry, Northeast Normal University, Ren Min Street No. 5268, Changchun, Jilin, 130024, People's Republic of China. E-mail: [tanhq870@126.com](mailto:tanhq870@126.com) , [wangyh319@nenu.edu.cn](mailto:wangyh319@nenu.edu.cn), [lyg658@nenu.edu.cn](mailto:lyg658@nenu.edu.cn)

<sup>b</sup> State Key Laboratory of Applied Optics, Changchun Institute of Optics, Fine Mechanics and Physics, Chinese Academy of Sciences, Changchun 130033, P. R. China.

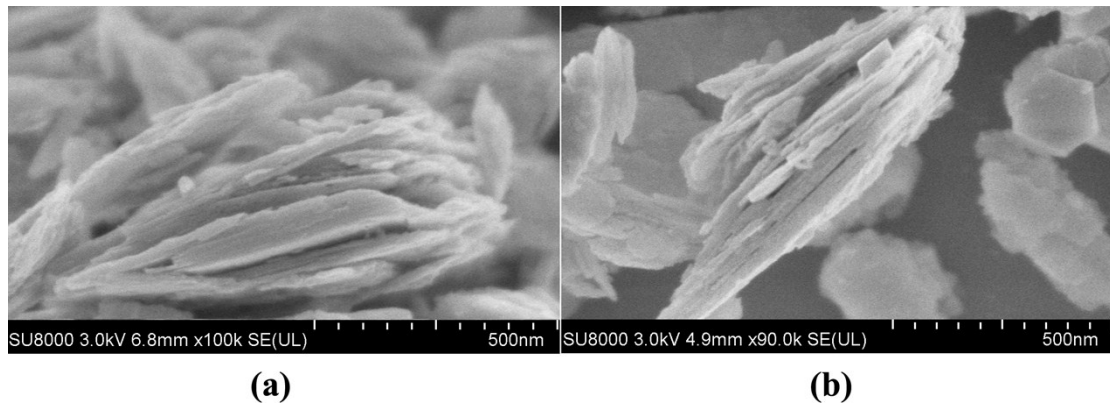

**Fig. S1** The SEM images of Bi/Nb-0.1g, which reveals  $\text{Bi}_2\text{O}_x\text{S}_{3-x}$  nanosheets are stacked with  $\text{Nb}_6\text{O}_{17}$  nanosheets in the composite to form a 2D sheets complex.

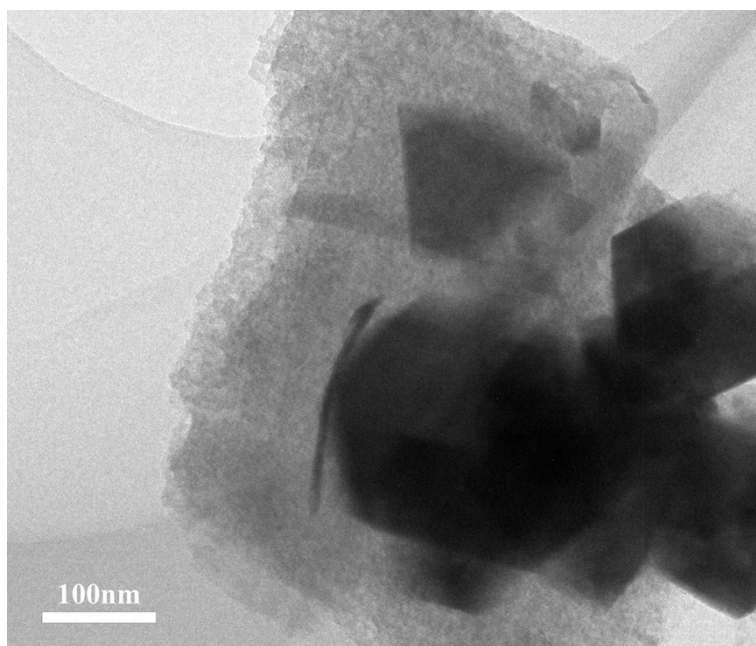

**Fig. S2** TEM image of the Bi/Nb-0.1g.

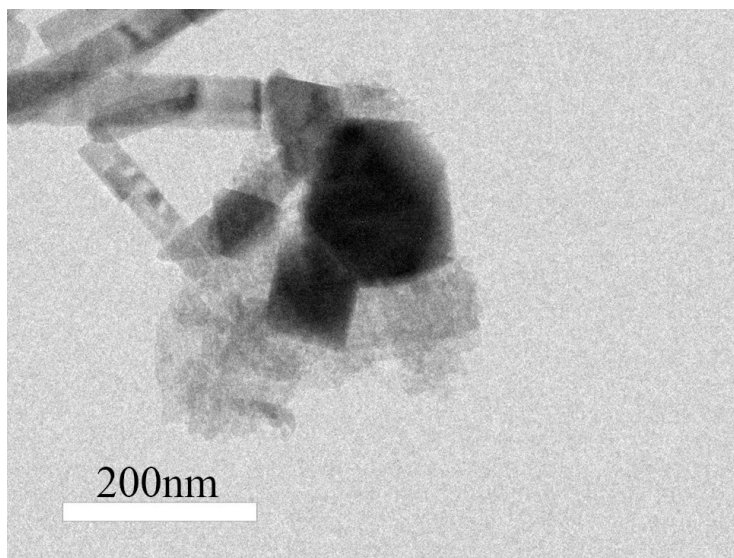

**Fig. S3** TEM image of the Bi/Nb-0.3g. Some nanorods of  $\text{Bi}_2\text{S}_3$  can be detected.

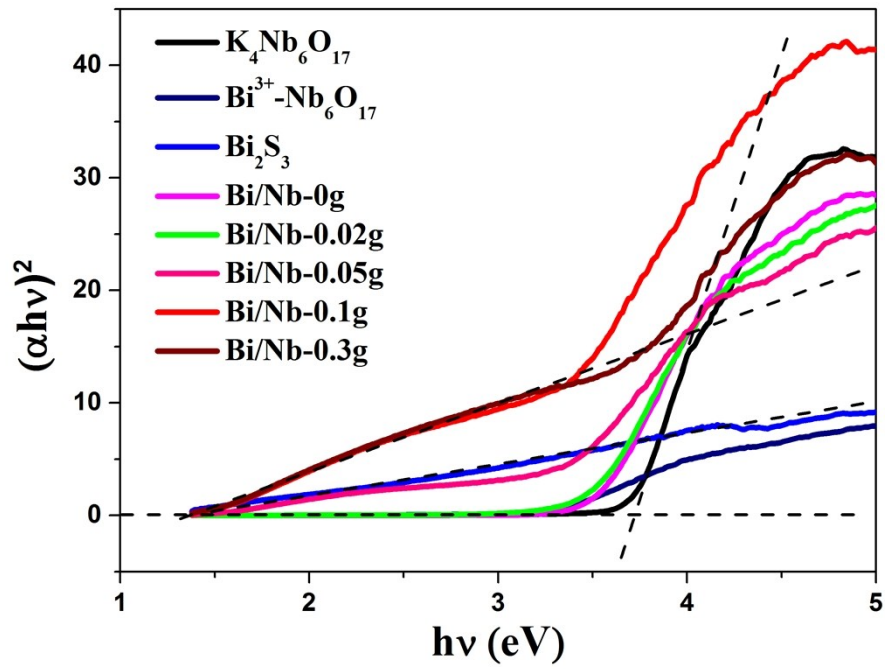

**Fig. S4** The relationship between  $(\alpha h\nu)^2$  and photon energy ( $h\nu$ ) for pure  $\text{Bi}_2\text{S}_3$ ,  $\text{K}_4\text{Nb}_6\text{O}_{17}$  and  $\text{Bi/Nb}$  composites.

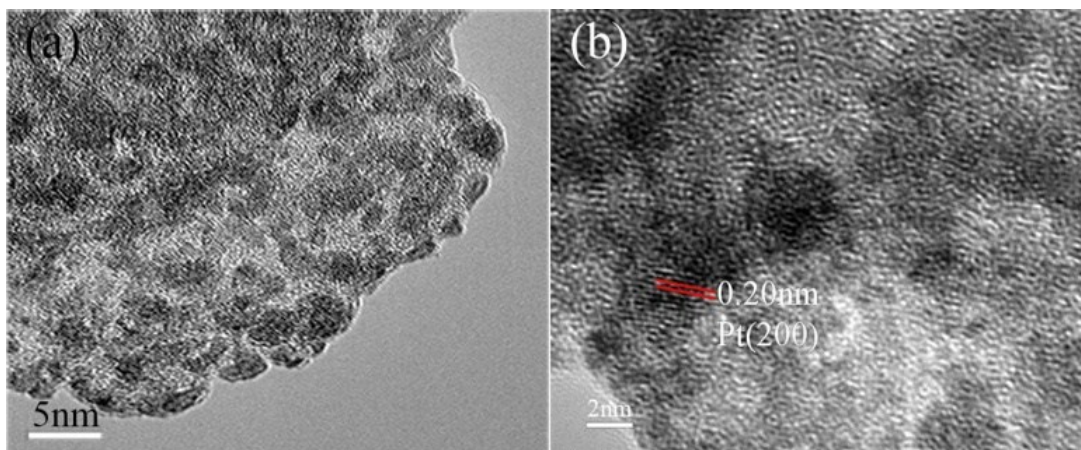

**Fig. S5** (a)TEM and (b)HRTEM images of Pt nanoparticles loaded on Bi/Nb-0.1g after visible light irradiation.

$\text{H}_2\text{PtCl}_6$  used as electrons trapping agent can further illustrate the transmission path of photoexcited electron. A certain amount of Bi/Nb-0.1g composite was added to 20mL 3%  $\text{H}_2\text{PtCl}_6$  solution, then photo irradiated with visible light ( $\lambda > 400 \text{ nm}$ ). As shown in Fig. S5a, after photoirradiation, the Pt nanoparticles were deposited on the  $\text{Nb}_6\text{O}_{17}$  sheets. HRTEM show the clear lattice diffraction fringes with the lattice plane distances 0.20 nm can be assigned to Pt 211 lattice plane (Fig. S5b).

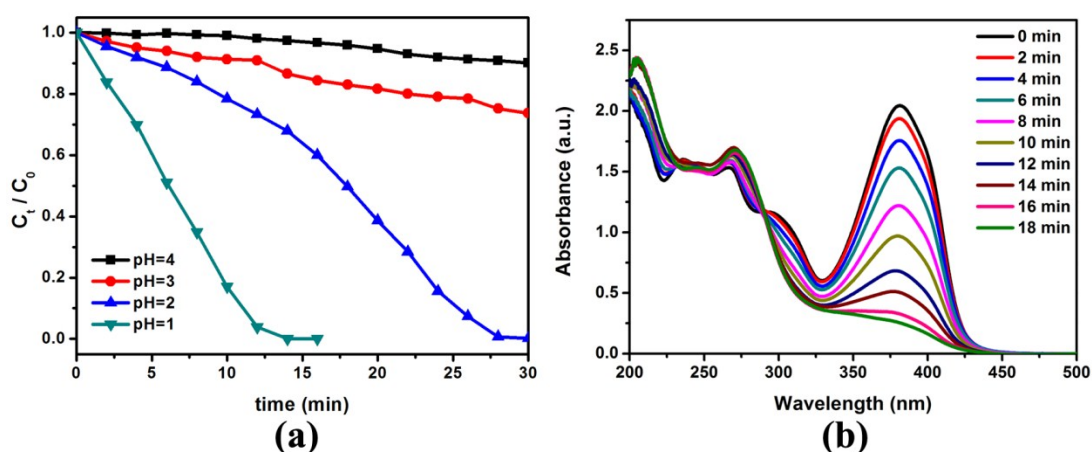

**Fig. S6** (a) The influence of pH values on the photocatalytic performance of Bi/Nb-0.1g; (b) UV-Vis spectral changes during the photodegradation of tetracyclines using

Bi/Nb-0.1g as catalyst under visible light irradiation. 20 mg photocatalyst and 20 mL tetracyclines solution (40 ppm) was used in photocatalysis under visible light irradiation.
